# Supplementary material for: Manifestation of excitonic resonance in diffuse reflectance spectra of halide perovskites
Source: Royal Society of Chemistry journal article supplement (doi:10.1039/d5cp03576g), 2025-11-27
Supplement: d5cp03576g1.pdf [file d5cp03576g1.pdf]

## SUPPORTING INFORMATION

### Manifestation of Excitonic Resonance in Diffuse Reflectance Spectra of Halide Perovskites

Vyacheslav N. Kuznetsov,<sup>1</sup> Yuri V. Chizhov,<sup>2</sup> Nadezhda I. Glazkova,<sup>1</sup> Galina V. Kataeva<sup>3</sup>  
Ruslan V. Mikhaylov,<sup>2</sup> Vladimir K. Ryabchuk,<sup>2</sup> Alexei V. Emeline,<sup>1,2</sup> and Nick Serpone<sup>4\*</sup>

<sup>1</sup> Photoactive Nanocomposite Materials Laboratory, St. Petersburg State University, Universitetskaya nab. 7/9, St. Petersburg, Petergof, 199034 Russian Federation. [bv.n.kuznetsov@spbu.ru](mailto:bv.n.kuznetsov@spbu.ru)

<sup>2</sup> Department of Photonics, Faculty of Physics, St. Petersburg State University, Universitetskaya nab. 7/9, St. Petersburg, Petergof, 199034 Russian Federation.

<sup>3</sup> Department of General and Applied Physics, Moscow State University of Civil Engineering, Yaroslavskoye shosse, 26, Moscow, 129337 Russian Federation.

<sup>4</sup> PhotoGreen Laboratory, Dipartimento di Chimica, Università di Pavia, via Taramelli 12, Pavia 27100, Italia; [nick.serpone@unipv.it](mailto:nick.serpone@unipv.it)

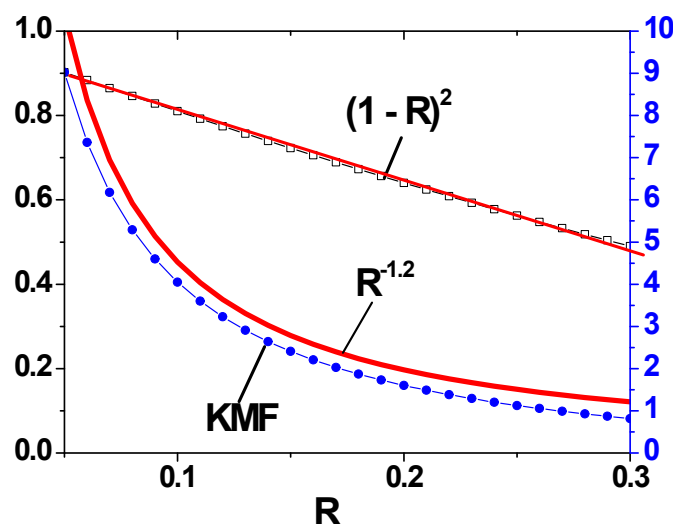

Figure SI1. Graphic showing the dependence of the KM function and its numerator,  $(1 - R)^2$ , on  $R$  at low values of  $R$ . It is seen that the numerator is a linear function of  $R$ , but the KMF is nonlinear and can be fitted by the function  $R^{-1.2}$  which is rather close to the function  $1/R$ .

Due to the nonlinearity of the KM function in the range  $R < 0.3$ , a weak minimum  $R$  of the excitonic resonance, observed in DR spectra (see Figure 5), transforms into a pronounced maximum P2 band in KMF spectra.
